# Supplementary material
Source: PubMed Central journal article supplement (PMC7015372)
Supplement: dib-0001-0052-s01.pdf [file dib-0001-0052-s01.pdf]

# End Of Study Survey

Please complete the survey below.

Thank you!

---

---

**Please complete each item regarding the BioStampRC sensors to the best of your abilities.  
Select the appropriate answer.**

- 1) How comfortable were the wearable sensors?
  - Very Comfortable
  - Comfortable
  - Neutral
  - Uncomfortable
  - Very Uncomfortable
- 2) How securely did the motion sensors stay on your body throughout the study period?
  - Very Securely
  - Securely
  - Neutral
  - Came Loose
  - Fell Off
- 3) How often did the sensors interfere with your daily activities?
  - Never
  - Occasionally
  - Sometimes
  - Often
  - Always
- 4) How difficult was it to remove the sensors?
  - Very Easy
  - Easy
  - Neutral
  - Difficult
  - Very Difficult
- 5) How willing would you be to wear these sensors in the future if your doctor asked you to?
  - Very Willing
  - Willing
  - Neutral
  - Unwilling
  - Very Unwilling
- 6) How was your experience with the sensors, on the whole?
  - Very Pleased
  - Pleased
  - Neutral
  - Displeased
  - Very Displeased
- 7) What was the most valuable application of the sensor?  
\_\_\_\_\_
- 8) What was the biggest drawback of the sensor?  
\_\_\_\_\_
- 9) What, if anything, would you like to see improved about the BioStampRC sensor?  
\_\_\_\_\_

- 10) If you have feedback about the study, please let us know here. Thank you!
-
