# Supplementary material
Source: PubMed Central journal article supplement (PMC7015372)
Supplement: dib-0001-0052-s02.pdf [file dib-0001-0052-s02.pdf]

| Chest and Thigh Dominant axis: Posture                 | Final Posture |
|--------------------------------------------------------|---------------|
| +x and +x: Lying on right side with leg in air         | Lying Down    |
| +x and +y: Lying on right side                         |               |
| +x and +z: Lying on right side with leg toes-up        |               |
| +x and -y: Lying on right side with leg turned to left |               |
| +x and -z: Lying on right side with leg toes-down      |               |
| +z and +x: Lying on back with leg in air               |               |
| +z and +y: Lying on back with leg turned to right      |               |
| +z and +z: Lying on back                               |               |
| +z and -x: Lying on back with leg hanging down         |               |
| +z and -y: Lying on back with leg turned to left       |               |
| +z and -z: Lying on back with toes over head           |               |
| -x and +x: Lying on left side with leg in air          |               |
| -x and +y: Lying on left side with leg turned to right |               |
| -x and +z: Lying on left side with leg toes-up         |               |
| -x and -y: Lying on left side                          |               |
| -x and -z: Lying on left side with leg toes-down       |               |
| -y and -z: Lying face-down with torso hanging down     |               |
| -z and +x: Lying face-down with leg in air             |               |
| -z and +y: Lying face-down with leg turned to left     |               |
| -z and +z: Lying down and touching toes                |               |
| -z and -y: Lying face-down with leg turned to right    |               |
| -z and -z: Lying face-down                             |               |
| +y and -z: Lying face down with chest up               |               |
| +y and +z: Sitting                                     |               |
| +y and -x: Upright                                     | Upright       |
| -x and -x: Upright and leaning to left                 |               |
| -y and -x: Upright doubled-over                        |               |
| -z and -x: Upright bent forward horizontally           |               |
| +x and -x: Upright and leaning to right                |               |
| +y and +x: Standing/sitting with leg in the air        | Stand/Sit     |
| +y and +y: Standing/sitting with leg extended to right |               |
| +y and -y: Standing/sitting with leg extended to left  |               |
| -y and +x: Upside-down                                 | Upside Down   |
| -y and +y: Upside-down with leg turned to right        |               |
| -y and +z: Upside-down with leg horizontal toes-up     |               |
| -y and -y: Upside-down with leg turned to left         |               |

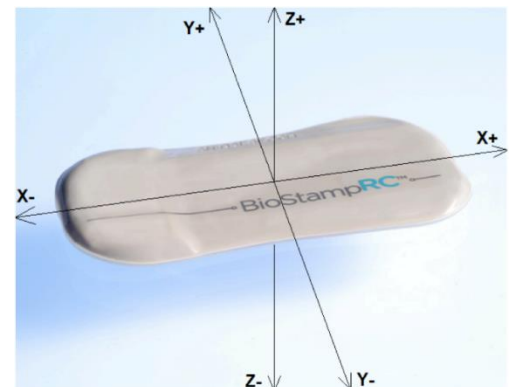

**Supplementary Table 1.** Chest and thigh dominant axis with corresponding postures

\*Anomalous “upside-down” posture accounts for 0.5-1% of all postures, omitted from analysis
